# Supplementary material for: 12-Month Trajectories of Health-Related Quality of Life Following Hospitalization in German Cancer Centers—A Secondary Data Analysis
Source: MDPI journal article supplement (doi:10.3390/curroncol31050177), 2024-04-23
Supplement: s1 [file s1]

| Cancer Type                   | Timepoint      | Mean  | 95% CI |       | Differences over time<br>t1-t2, t1-t3 | Differences between groups<br>Reference: |              |                    |                    |             |                 |          |
|-------------------------------|----------------|-------|--------|-------|---------------------------------------|------------------------------------------|--------------|--------------------|--------------------|-------------|-----------------|----------|
|                               |                |       | lower  | upper |                                       | Breast                                   | Skin         | Gyneco-<br>logical | Digestive<br>tract | Lung        | Oral/<br>facial | Prostate |
| Breast (C50)                  | Baseline (t1)  | 37.19 | 35.51  | 38.86 | -                                     | -                                        | -            | -                  | -                  | -           | -               | -        |
|                               | 6 months (t2)  | 37.52 | 35.77  | 39.27 | 0.33                                  | -                                        | -            | -                  | -                  | -           | -               | -        |
|                               | 12 months (t3) | 39.42 | 37.73  | 41.11 | 2.23                                  | -                                        | -            | -                  | -                  | -           | -               | -        |
| Skin (C34, C44)               | Baseline (t1)  | 39.72 | 37.99  | 41.45 | -                                     | 2.53                                     | -            | -                  | -                  | -           | -               | -        |
|                               | 6 months (t2)  | 40.56 | 38.74  | 42.39 | 0.84                                  | 3.04                                     | -            | -                  | -                  | -           | -               | -        |
|                               | 12 months (t3) | 40.59 | 38.67  | 42.50 | 0.87                                  | 1.17                                     | -            | -                  | -                  | -           | -               | -        |
| Gynecological (C51-C58)       | Baseline (t1)  | 32.40 | 30.53  | 34.26 | -                                     | <b>-4.79</b>                             | <b>-7.32</b> | -                  | -                  | -           | -               | -        |
|                               | 6 months (t2)  | 36.37 | 34.26  | 38.48 | 3.97                                  | -1.15                                    | <b>-4.19</b> | -                  | -                  | -           | -               | -        |
|                               | 12 months (t3) | 37.10 | 34.95  | 39.26 | <b>4.70</b>                           | -2.32                                    | -3.49        | -                  | -                  | -           | -               | -        |
| Digestive tract (C16-C21)     | Baseline (t1)  | 36.12 | 34.33  | 37.91 | -                                     | -1.07                                    | <b>-3.60</b> | <b>3.72</b>        | -                  | -           | -               | -        |
|                               | 6 months (t2)  | 38.11 | 36.25  | 39.98 | 1.99                                  | 0.59                                     | -2.45        | 1.74               | -                  | -           | -               | -        |
|                               | 12 months (t3) | 38.63 | 36.65  | 40.61 | 2.51                                  | -0.79                                    | -1.96        | 1.53               | -                  | -           | -               | -        |
| Lung (C34)                    | Baseline (t1)  | 33.90 | 31.94  | 35.86 | -                                     | -3.29                                    | <b>-5.82</b> | 1.5                | -2.22              | -           | -               | -        |
|                               | 6 months (t2)  | 34.31 | 32.03  | 36.59 | 0.41                                  | -3.21                                    | <b>-6.25</b> | -2.06              | -3.8               | -           | -               | -        |
|                               | 12 months (t3) | 33.74 | 31.22  | 36.26 | -0.16                                 | <b>-5.68</b>                             | <b>-6.85</b> | -3.36              | <b>-4.89</b>       | -           | -               | -        |
| Oral/facial (C01-C14)         | Baseline (t1)  | 35.93 | 33.68  | 38.18 | -                                     | -1.26                                    | -3.79        | 3.53               | -0.19              | 2.03        | -               | -        |
|                               | 6 months (t2)  | 36.72 | 34.13  | 39.30 | 0.79                                  | -0.80                                    | -3.84        | 0.35               | -1.39              | 2.41        | -               | -        |
|                               | 12 months (t3) | 38.35 | 35.53  | 41.17 | 2.42                                  | -1.07                                    | -2.24        | 1.25               | -0.28              | 4.61        | -               | -        |
| Prostate/germ cell (C61, C62) | Baseline (t1)  | 34.97 | 32.27  | 37.66 | -                                     | -2.22                                    | <b>4.75</b>  | 2.57               | -1.15              | 1.07        | -0.96           | -        |
|                               | 6 months (t2)  | 39.55 | 36.70  | 42.4  | 4.58                                  | 2.03                                     | 1.01         | 3.18               | 1.44               | <b>5.24</b> | 2.83            | -        |
|                               | 12 months (t3) | 39.61 | 36.75  | 42.48 | 4.64                                  | 0.19                                     | 0.98         | 2.51               | 0.98               | <b>5.87</b> | 1.26            | -        |
| Other                         | Baseline (t1)  | 36.26 | 34.61  | 37.91 | -                                     | -0.93                                    | <b>3.46</b>  | <b>3.86</b>        | 0.14               | 2.36        | 0.33            | 1.29     |
|                               | 6 months (t2)  | 37.42 | 35.41  | 39.44 | 1.16                                  | -0.10                                    | 3.14         | 1.05               | -0.69              | 3.11        | 0.7             | -2.13    |
|                               | 12 months (t3) | 38.32 | 36.28  | 40.35 | 2.06                                  | -1.10                                    | 2.27         | 1.22               | -0.31              | <b>4.58</b> | -0.03           | -1.29    |

Table S1: Trajectories (values) of HRQoL-scores (PCS) after hospitalisation at baseline. PCS= SF 12 Physical Health Summary Scale. Values adjusted for: age at diagnosis, sex, time of survey, time since diagnosis, metastatic disease, T-stage, N-stage, disease status, reason for hospitalisation, physical comorbidities, emotional comorbidities, radiotherapy, chemotherapy, surgery, education, partnership, occupation, interactions: time of survey by cancer type and time since diagnosis by cancer type. Bold: Significant differences. 95% CI: 95% confidence interval.

| Cancer Type                   | Timepoint      | Mean  | 95% CI |       | Differences over time<br>t1-t2, t1-t3 | Differences between groups<br>Reference: |       |                    |                    |       |                 |          |
|-------------------------------|----------------|-------|--------|-------|---------------------------------------|------------------------------------------|-------|--------------------|--------------------|-------|-----------------|----------|
|                               |                |       | lower  | upper |                                       | Breast                                   | Skin  | Gyneco-<br>logical | Digestive<br>tract | Lung  | Oral/<br>facial | Prostate |
| Breast (C50)                  | Baseline (t1)  | 42.17 | 40.06  | 44.28 | -                                     | -                                        | -     | -                  | -                  | -     | -               | -        |
|                               | 6 months (t2)  | 44.97 | 42.79  | 47.14 | 2.80                                  | -                                        | -     | -                  | -                  | -     | -               | -        |
|                               | 12 months (t3) | 44.98 | 42.76  | 47.2  | 2.81                                  | -                                        | -     | -                  | -                  | -     | -               | -        |
| Skin (C34, C44)               | Baseline (t1)  | 43.80 | 41.50  | 46.11 | -                                     | 1.63                                     | -     | -                  | -                  | -     | -               | -        |
|                               | 6 months (t2)  | 44.99 | 42.69  | 47.28 | 1.19                                  | 0.02                                     | -     | -                  | -                  | -     | -               | -        |
|                               | 12 months (t3) | 45.01 | 42.60  | 47.42 | 1.21                                  | 0.03                                     | -     | -                  | -                  | -     | -               | -        |
| Gynecological (C51-C58)       | Baseline (t1)  | 42.93 | 40.54  | 45.32 | -                                     | 0.76                                     | -0.87 | -                  | -                  | -     | -               | -        |
|                               | 6 months (t2)  | 44.04 | 41.30  | 46.78 | 1.11                                  | -0.93                                    | -0.95 | -                  | -                  | -     | -               | -        |
|                               | 12 months (t3) | 46.07 | 43.42  | 48.73 | 3.14                                  | 1.09                                     | 1.06  | -                  | -                  | -     | -               | -        |
| Digestive tract (C16-C21)     | Baseline (t1)  | 43.57 | 41.37  | 45.77 | -                                     | 1.40                                     | -0.23 | 0.64               | -                  | -     | -               | -        |
|                               | 6 months (t2)  | 43.38 | 40.91  | 45.84 | -0.19                                 | -1.59                                    | -1.61 | -0.66              | -                  | -     | -               | -        |
|                               | 12 months (t3) | 43.98 | 41.44  | 46.52 | 0.41                                  | -1.00                                    | -1.03 | -2.09              | -                  | -     | -               | -        |
| Lung (C34)                    | Baseline (t1)  | 43.39 | 40.79  | 45.99 | -                                     | 1.22                                     | -0.41 | 0.46               | -0.18              | -     | -               | -        |
|                               | 6 months (t2)  | 42.22 | 39.04  | 45.41 | -1.17                                 | -2.75                                    | -2.77 | -1.82              | -1.16              | -     | -               | -        |
|                               | 12 months (t3) | 40.94 | 37.58  | 44.30 | -2.45                                 | -4.04                                    | -4.07 | -5.13              | -3.04              | -     | -               | -        |
| Oral/facial (C01-C14)         | Baseline (t1)  | 42.43 | 39.63  | 45.23 | -                                     | 0.26                                     | -1.37 | -0.5               | -1.14              | -0.96 | -               | -        |
|                               | 6 months (t2)  | 43.63 | 40.33  | 46.94 | 1.20                                  | -1.34                                    | -1.36 | -0.41              | 0.25               | 1.41  | -               | -        |
|                               | 12 months (t3) | 44.08 | 40.73  | 47.43 | 1.65                                  | -0.90                                    | -0.93 | -1.99              | 0.1                | 3.14  | -               | -        |
| Prostate/germ cell (C61, C62) | Baseline (t1)  | 40.84 | 35.99  | 45.68 | -                                     | -1.33                                    | -2.96 | -2.09              | -2.73              | -2.55 | -1.59           | -        |
|                               | 6 months (t2)  | 41.33 | 36.39  | 46.28 | 0.49                                  | -3.64                                    | -3.66 | -2.71              | -2.05              | -0.89 | -2.3            | -        |
|                               | 12 months (t3) | 43.15 | 38.26  | 48.03 | 2.31                                  | -1.83                                    | -1.86 | -2.92              | -0.83              | 2.21  | -0.93           | -        |
| Other                         | Baseline (t1)  | 43.19 | 41.21  | 45.18 | -                                     | 1.02                                     | -0.61 | 0.26               | -0.38              | -0.20 | 0.76            | 2.35     |
|                               | 6 months (t2)  | 43.73 | 41.31  | 46.15 | 0.54                                  | -1.24                                    | -1.26 | -0.31              | 0.35               | 1.51  | 0.1             | 2.4      |
|                               | 12 months (t3) | 45.20 | 42.77  | 47.63 | 2.01                                  | 0.22                                     | 0.19  | -0.87              | 1.22               | 4.26  | 1.12            | 2.05     |

Table S2: Trajectories (values) of HRQoL-scores (MCS) after hospitalisation at baseline. MCS= SF 12 Mental Health Summary Scale. Values adjusted for: age at diagnosis, sex, time of survey, time since diagnosis, metastatic disease, T-stage, N-stage, disease status, reason for hospitalisation, physical comorbidities, emotional comorbidities, radiotherapy, chemotherapy, surgery, education, partnership, occupation, interactions: time of survey by cancer type and time since diagnosis by cancer type. Bold: Significant differences. 95% CI: 95% confidence interval.

## Results of the Generalized Linear Model. Interaction terms

|                                  |                                  | Modell<br>PCS |               |       | Modell<br>MCS |              |       |
|----------------------------------|----------------------------------|---------------|---------------|-------|---------------|--------------|-------|
| Variable                         | Value                            | B             | 95% CI        | p     | B             | 95% CI       | p     |
| Time point*cancer type           |                                  |               |               |       |               |              |       |
|                                  | t1 x breast (ref)                |               |               |       |               |              |       |
|                                  | t1 * skin                        | 0.51          | -1.07; 2.09   | 0.53  | -1.61         | -3.51; 0.29  | 0.10  |
|                                  | t1 * gynecological               | 3.64          | 1.73; 5.55    | <0.01 | -1.69         | -3.83; 0.46  | 0.12  |
|                                  | t1 * digestive tract             | 1.66          | -0.13; 3.44   | 0.07  | -2.99         | -5.26; -0.72 | 0.01  |
|                                  | t1 * lung                        | 0.08          | -2.08; 2.23   | 0.95  | -3.96         | -6.72; -1.20 | 0.01  |
|                                  | t1 * oral/facial                 | 0.45          | -2.12; 3.01   | 0.73  | -1.59         | -4.43; 1.25  | 0.27  |
|                                  | t1 * prostate/germ cell          | 4.25          | 2.14; 6.35    | <0.01 | -2.30         | -4.58; -0.03 | <0.05 |
|                                  | t1 * other                       | 0.83          | -1.07; 2.72   | 0.39  | -2.26         | -4.50; -0.01 | <0.05 |
|                                  | t2 * breast                      |               |               |       |               |              |       |
|                                  | t2 * skin                        | -1.36         | -2.93; 0.20   | 0.09  | -1.60         | -3.63; 0.43  | 0.12  |
|                                  | t2 * gynecological               | 2.47          | 0.57; 4.38    | 0.01  | 0.33          | -1.87; 2.53  | 0.77  |
|                                  | t2 * digestive tract             | 0.28          | -1.54; 2.10   | 0.76  | -2.40         | -4.71; -0.08 | 0.04  |
|                                  | t2 * lung                        | -2.39         | -4.73; -0.05  | <0.05 | -5.25         | -8.27; -2.24 | <0.01 |
|                                  | t2 * oral/facial                 | 0.19          | -2.52; 2.89   | 0.89  | -1.16         | -3.97; 1.66  | 0.42  |
|                                  | t2 * prostate/germ cell          | 2.42          | 0.36; 4.47    | 0.02  | -0.50         | -2.89; 1.89  | 0.68  |
|                                  | t2 * other                       | -0.18         | -2.10; 1.75   | 0.86  | -0.80         | -3.09; 1.49  | 0.49  |
| Time since diagnosis*cancer type |                                  |               |               |       |               |              |       |
|                                  | skin * 0/1 month                 |               |               |       |               |              |       |
|                                  | skin * 2-4 months                | 0.04          | -3.44; 3.51   | 0.98  | 1.64          | -3.07; 6.35  | 0.49  |
|                                  | skin * 5-12 months               | -3.60         | -7.76; 0.57   | 0.09  | -0.41         | -6.05; 5.22  | 0.89  |
|                                  | skin * >12 months                | 0.38          | -4.46; 5.22   | 0.88  | 1.75          | -4.41; 7.91  | 0.58  |
|                                  | skin * unknown                   | 1.08          | -3.58; 5.74   | 0.65  | 0.55          | -5.19; 6.30  | 0.85  |
|                                  | gynecological * 0/1 month        |               |               |       |               |              |       |
|                                  | gynecological * 2-4 months       | -0.94         | -4.11; 2.24   | 0.56  | -0.23         | -4.36; 3.91  | 0.91  |
|                                  | gynecological * 5-12 months      | -2.11         | -5.92; 1.70   | 0.28  | 0.66          | -4.79; 6.11  | 0.81  |
|                                  | gynecological * >12 months       | -1.89         | -7.19; 3.41   | 0.48  | -2.41         | -8.22; 3.40  | 0.42  |
|                                  | gynecological * unknown          | -5.81         | -10.81; -0.80 | 0.02  | 0.07          | -6.34; 6.48  | 0.98  |
|                                  | digestive tract * 0/1 month      |               |               |       |               |              |       |
|                                  | digestive tract * 2-4 months     | -2.19         | -5.66; 1.28   | 0.22  | 0.12          | -4.42; 4.65  | 0.96  |
|                                  | digestive tract * 5-12 months    | -2.37         | -6.64; 1.90   | 0.28  | 0.07          | -5.30; 5.44  | 0.98  |
|                                  | digestive tract * >12 months     | -1.32         | -5.96; 3.32   | 0.58  | 1.23          | -4.43; 6.89  | 0.67  |
|                                  | digestive tract * unknown        | -2.30         | -7.67; 3.07   | 0.40  | -0.07         | -5.59; 5.46  | 0.98  |
|                                  | lung * 0/1 month                 |               |               |       |               |              |       |
|                                  | lung * 2-4 months                | 1.31          | -3.53; 6.15   | 0.60  | -0.77         | -7.56; 6.03  | 0.83  |
|                                  | lung * 5-12 months               | 0.24          | -4.68; 5.17   | 0.92  | -0.50         | -7.43; 6.42  | 0.89  |
|                                  | lung * >12 months                | 3.24          | -3.14; 9.62   | 0.32  | 1.76          | -6.17; 9.69  | 0.66  |
|                                  | lung * unknown                   | -0.17         | -6.20; 5.85   | 0.96  | 2.51          | -5.77; 10.79 | 0.55  |
|                                  | oral/facial * 0/1 month          |               |               |       |               |              |       |
|                                  | oral/facial * 2-4 months         | 1.87          | -4.07; 7.81   | 0.54  | 5.74          | -2.76; 14.23 | 0.19  |
|                                  | oral/facial * 5-12 months        | -0.59         | -7.30; 6.12   | 0.86  | 4.15          | -5.17; 13.48 | 0.38  |
|                                  | oral/facial * >12 months         | 1.69          | -6.28; 9.65   | 0.68  | 8.56          | -0.30; 17.41 | 0.06  |
|                                  | oral/facial * unknown            | -1.66         | -8.58; 5.27   | 0.64  | 3.58          | -6.22; 13.37 | 0.47  |
|                                  | prostate/germ cell * 0/1 month   |               |               |       |               |              |       |
|                                  | prostate/germ cell * 2-4 months  | -4.74         | -10.58; 1.12  | 0.11  | -4.11         | -14.01; 5.79 | 0.42  |
|                                  | prostate/germ cell * 5-12 months | -7.90         | -14.63; -1.17 | 0.02  | 0.21          | -7.91; 8.32  | 0.96  |
|                                  | prostate/germ cell * >12 months  | -9.28         | -18.40; -0.17 | <0.05 | -17.38        | -36.87; 2.11 | 0.08  |
|                                  | prostate/germ cell * unknown     | -2.82         | -7.28; 1.65   | 0.22  | -4.53         | -10.22; 1.17 | 0.12  |
|                                  | other * 0/1 month                |               |               |       |               |              |       |
|                                  | other * 2-4 months               | -1.91         | -5.21; 1.39   | 0.26  | -3.81         | -8.22; 0.61  | 0.09  |
|                                  | other * 5-12 months              | -0.98         | -4.85; 2.89   | 0.62  | -4.17         | -9.22; 0.89  | 0.11  |
|                                  | other * >12 months               | 0.69          | -4.40; 5.78   | 0.79  | -1.11         | -7.27; 5.05  | 0.72  |
|                                  | other * unknown                  | -2.85         | -7.32; 1.63   | 0.21  | -5.34         | -10.71; 0.02 | 0.05  |

*Table S3: Results of the Generalized Linear Model. Interaction terms (all other results in table 3). PCS= SF12 Physical Health Summary Scale, MCS= SF12 Mental Health Summary Scale, B= non-standardized regression coefficient (indicating a B point increase or decrease in the respective scale); 95% CI: 95% confidence interval; p = p-value.*
